# Supplementary material for: Organic selenium derived from chelation of soybean peptide-selenium and its functional properties in vitro and in vivo
Source: Royal Society of Chemistry journal article supplement (doi:10.1039/c9fo00729f), 2019-01-01
Supplement: c9fo00729f1.pdf [file c9fo00729f1.pdf]

1 **Supporting Information**

2

3 for

4

5 **Organic selenium derived from chelation of soybean peptides-selenium and its**

6 **functional properties *in vitro* and *in vivo***

7

8 Qianwen Ye, Xiaoping Wu, Xinyuan Zhang, Shaoyun Wang \*

9

10 College of Biological Science and Technology, Fuzhou University, Fuzhou 350108,

11 People's Republic of China

12

13

14

15 \*Corresponding Author

16 Tel: +86-591-22866375

17 Fax: +86-591-22866278

18 E-mail address: [shywang@fzu.edu.cn](mailto:shywang@fzu.edu.cn)

19

## 20 **1. Methods**

### 21 **1.1. Fluorescence spectroscopy**

22 Fluorescence spectrometry was measured by Hitachi F-4600 fluorescence  
23 spectrophotometer (Hitachi Co., Japan) to investigate the conformational changes of  
24 SPIP and SPIP-Se. The excitation wavelength was set at 295 nm and the emission at  
25 wavelengths between 300 and 500 nm were recorded.

### 26 **1.2. Cell viability assay**

27 MTT cell proliferation assay was performed to determine the cell viability. The cells  
28 were seeded on 96-well plastic cell culture clusters at a concentration of  $2 \times 10^5$   
29 cell/mL, and incubated in the culture medium containing SPIP or SPIP-Se samples  
30 (0~16  $\mu\text{g/mL}$ ) at 37 °C in a 5 % CO<sub>2</sub> for 24 h and 48h. Each well was incubated with  
31 20  $\mu\text{L}$  MTT (5 mg/mL) for another 4 h, then the supernatant was removed and 150  $\mu\text{L}$   
32 DMSO was added to each well. After sufficient shaking, the absorbance of the mixture  
33 was measured at 570 nm.

## 34 **2. Results and discussion**

### 35 **2.1. Fluorescence spectroscopy**

36 Fluorescence spectroscopy was then used to detect the structural evolution of SPIP  
37 when chelated with Se. As shown in Fig. S1, the fluorescence intensity decreased  
38 successively with chelating selenium. Compared to the SPIP, the endogenous  
39 fluorescence of SPIP-Se decreased from 140 to 94, which indicated that the structural  
40 folding and aggregation of amino acids or oligopeptides was occurred during the  
41 chelation process.

42 **2.2. Cell viability assay**

43 To determine cytotoxic to Caco-2 cells, we first examined the Caco-2 cells viabilities  
44 after 24 and 48 h of incubation at various concentrations of SPIP and SPIP-Se using  
45 MTT assay. As shown in Fig. S2, the SPIP-Se reduced cell proliferation of Caco-2 cells  
46 both in a dose-dependent and time-dependent manner. The results showed that the  
47 security concentration of SPIP-Se and SPIP on Caco-2 cells was chosen at 10 µg/mL,  
48 where the cell viability was around 90 % .

49

50 **Figure captions**

51 **Fig. S1**

52 The characterization of SPIP and SPIP-Se. Fluorescence spectra of SPIP and SPIP-Se  
53 over the wavelength range from 300 to 500 nm.

54 **Fig. S2**

55 The cytotoxicity of SPIP and SPIP-Se. (A) Caco-2 cells were treated with various  
56 concentrations of SPIP and SPIP-Se for 24 h. (B) Caco-2 cells were treated with various  
57 concentrations of SPIP and SPIP-Se for 48 h.

58

59

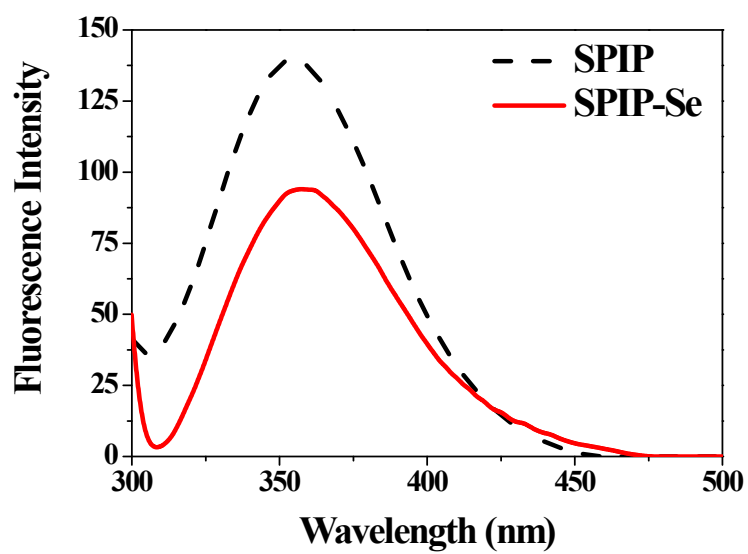

60

61

62

Fig.S1

63

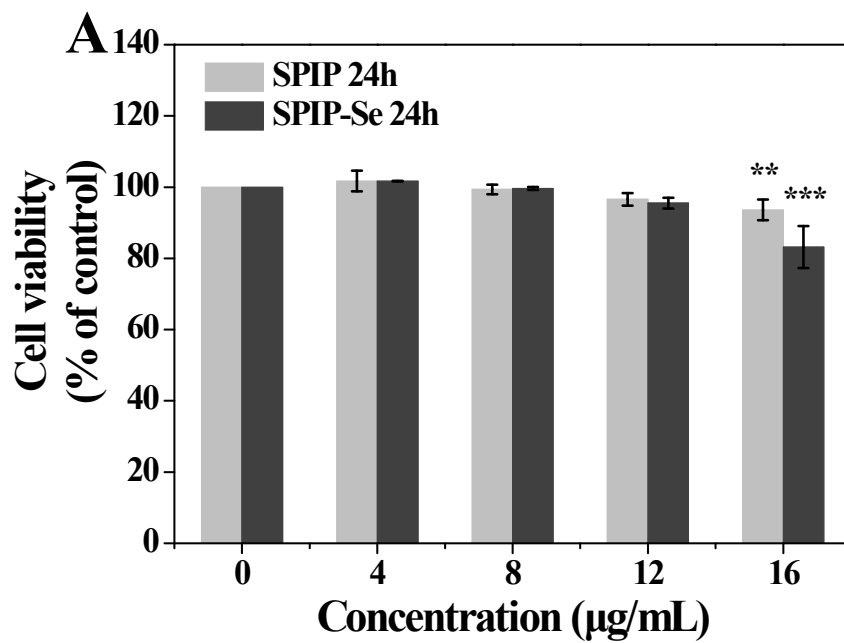

64

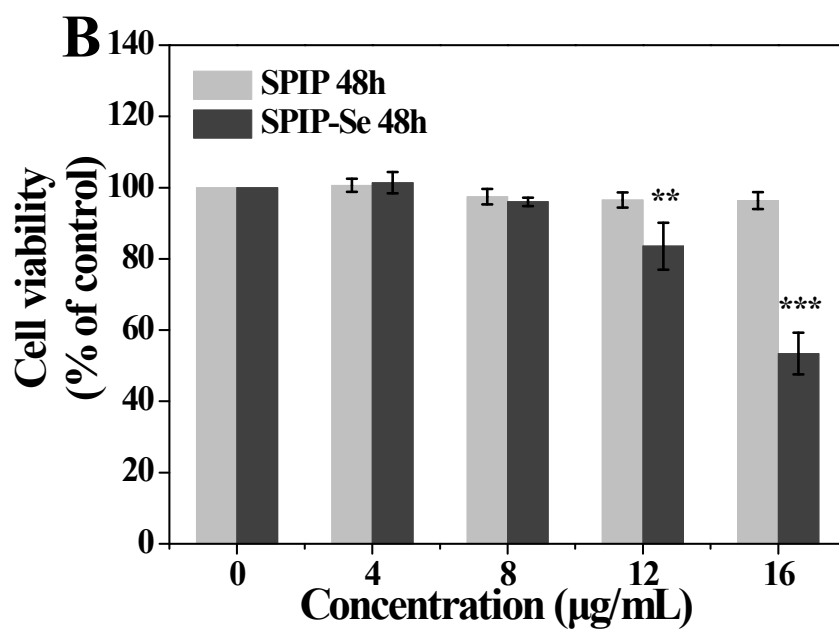

65

66

Fig.S2

67
